# Supplementary material
Source: publisher figshare collection journal article supplement (https://frontiersin.figshare.com/ndownloader/files/34132653)

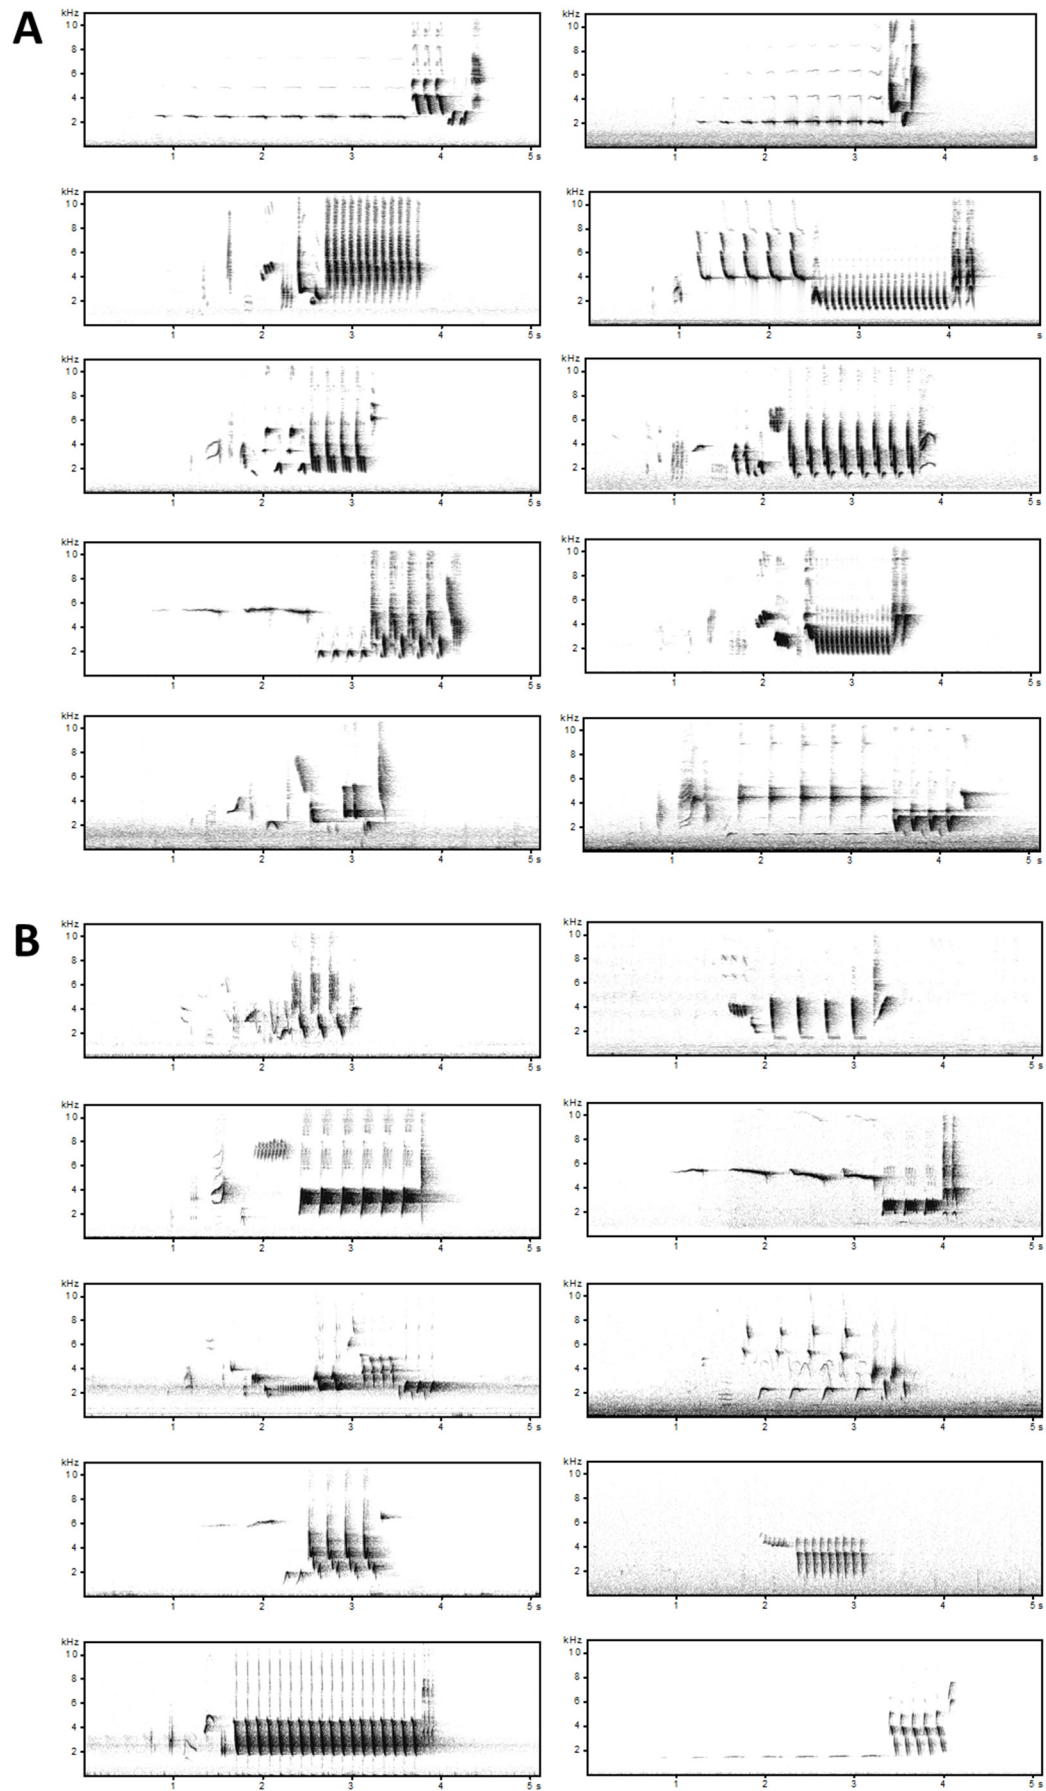

Supplementary Figure 1: The most common song types **(A)** and rare song types **(B)**.

Supplement: Supplementary file 1 [file 34132653]
